# Supplementary material
Source: PubMed Central journal article supplement (PMC2741300)

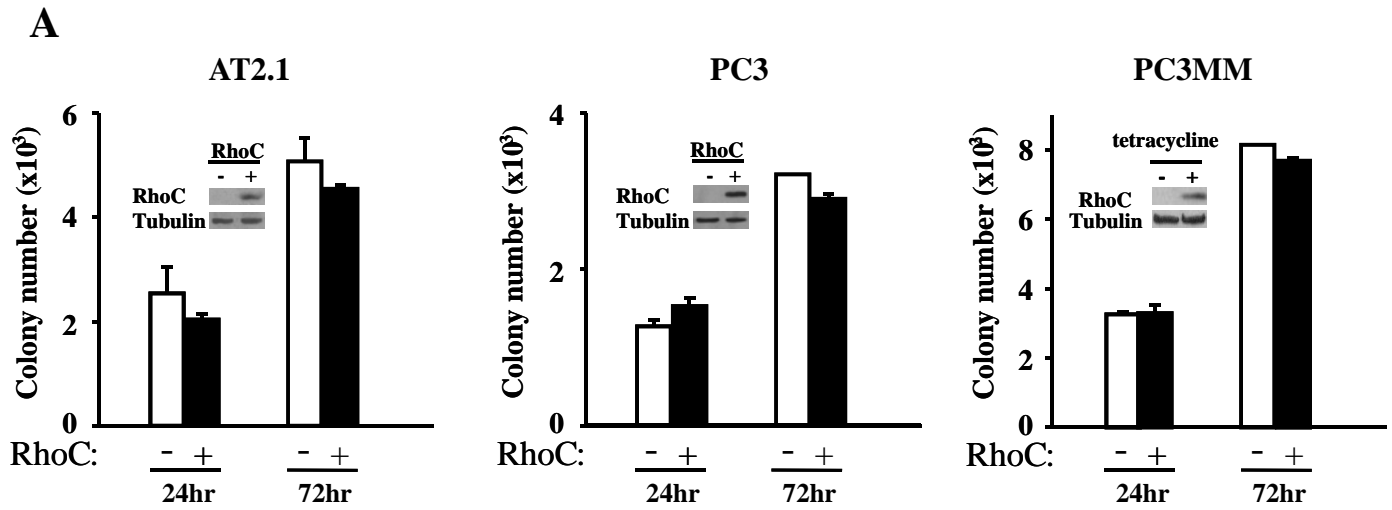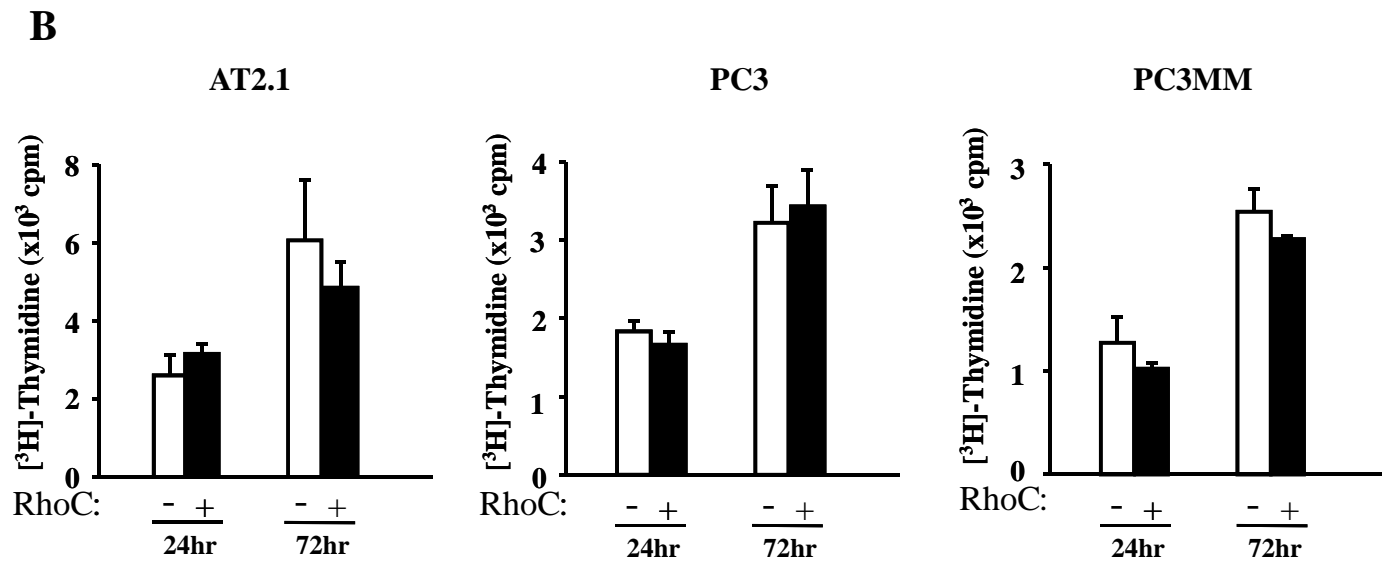

Supplement: NIHMS60003-supplement-Fig__1.pdf [file NIHMS60003-supplement-Fig__1.pdf]
